# Supplementary material for: The Effect of 6-Week Combined Balance and Plyometric Training on Dynamic Balance and Quickness Performance of Elite Badminton Players
Source: MDPI journal article supplement (doi:10.3390/ijerph19031605), 2022-01-30
Supplement: s1 [file s1]

**Table S1:** The balance training program for balance-plyometric (PB) (combined training) group.

| Exercises                                | The first stage (1-2 weeks)                                              | The second stage (3-4 weeks)                                                                                     | The third stage (5-6 weeks)                                                                                                             |
|------------------------------------------|--------------------------------------------------------------------------|------------------------------------------------------------------------------------------------------------------|-----------------------------------------------------------------------------------------------------------------------------------------|
| Stand on the balance board exercise      | Static standing on the board with two legs<br>(3 sets: 30 s/set)         | Static standing on the board with two legs and eyes closed<br>(3 sets: 30 s/set)                                 | Squat on the plate with eyes closed<br>(3 sets: 10 reps/set)                                                                            |
| Supine straight leg bridge on Swiss Ball | Isometric supine straight leg bridge on Swiss Ball<br>(3 sets: 30 s/set) | Isometric supine single-leg bending bridge on Swiss Ball<br>(3 sets: 30 s/set)                                   | Dynamic supine single-leg bending bridge on Swiss<br>(3 sets: 10 reps/set)                                                              |
| Side-plank with inflated balance disc    | Side-plank with inflated balance disc with elbow<br>(3 sets: 30 s/set)   | Side-plank with inflated balance disc and the non-supporting leg stretches backward<br>(3 sets: 10 reps/set)     | Side-plank with inflated balance disc and the non-supporting leg stretches backward with elastic band<br>(3 sets: 10 reps/set)          |
| Lunge squat on BOSU ball                 | Lunge squat on BOSU ball<br>(3 sets: 10 reps/leg/set)                    | Lunge squat on BOSU ball and inflated balance disc<br>(3 sets: 10 reps/leg/set)                                  | Lunge squat on BOSU ball and inflated balance disc with 5 kg dumbbells<br>(3 sets: 10 reps/leg/set)                                     |
| Airex® Balance-pad Elite exercise        | Single-leg squat with balance-pad<br>(3 sets: 10 reps/leg/set)           | Single-leg standing with balance-pad and the non-supporting leg stretches backward<br>(3 sets: 12 reps/leg/sets) | Single-leg support with balance-pad elite and the non-supporting leg stretches backward with elastic band<br>(3 sets: 12 reps/leg/sets) |
| Rest                                     | Between exercise: 60 s Between sets: 3 min                               |                                                                                                                  |                                                                                                                                         |

**Table S2:** The plyometric training (PT) program for PB and plyometric training group.

| Exercises                          | The first stage (1-2 weeks)                                         | The second stage (3-4 weeks)                                      | The third stage (5-6 weeks)                                         |
|------------------------------------|---------------------------------------------------------------------|-------------------------------------------------------------------|---------------------------------------------------------------------|
| Front barrier jump (6 hurdles)     | Double-leg front barrier jump (15 cm)<br>(3 sets: 10 reps/set)      | Single-leg front barrier jump (15 cm)<br>(3 sets: 5 reps/leg/set) | Single-leg front barrier jump (30 cm)<br>(4 sets: 5 reps/leg/set)   |
| Lateral high-knees with hurdles    | 4-hurdle (15 cm)<br>(3 sets: 2 reps/set)                            | 6-hurdle (30 cm)<br>(3 sets: 4 reps/set)                          | 6-hurdle (30 cm)<br>(3 sets: 6 reps/set)                            |
| Lateral barrier jump               | Double-leg jump (15 cm)<br>(3 sets: 10 reps/set)                    | Double-leg jump (30 cm)<br>(3 sets: 12 reps/set)                  | Single-leg jump (30 cm)<br>(3 sets: 15 reps/leg/set)                |
| Depth jump                         | Jump with 20 cm box<br>(3 sets: 8 reps/set)                         | Jump with 30 cm box<br>(3 sets: 8 reps/set)                       | Jump with 40 cm box<br>(3 sets: 8 reps/set)                         |
| Multi-direction jumps with hurdles | Triangle jump with double-leg (3 hurdles)<br>(3 sets: 6*3 reps/set) | Square jump with single-leg (4 hurdles)<br>(3 sets: 8*3 reps/set) | Hexagon jump with single-leg (6 hurdles)<br>(3 sets: 12*3 reps/set) |

|                                             |                                            |                         |                       |
|---------------------------------------------|--------------------------------------------|-------------------------|-----------------------|
| Intensity and number of contact with ground | Low intensity<br>144                       | Middle intensity<br>234 | High intensity<br>325 |
| Rest                                        | Between exercise: 60 s Between sets: 3 min |                         |                       |

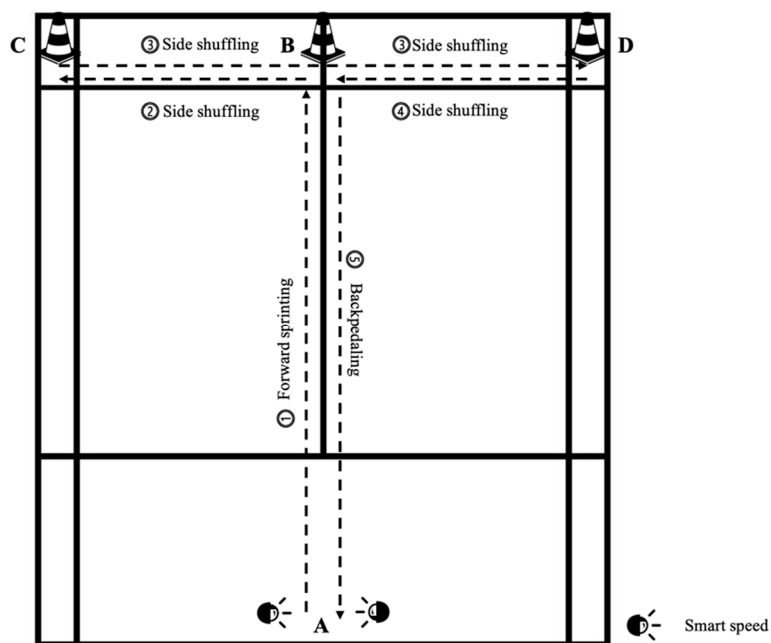

**Figure S1.** Modified T-test

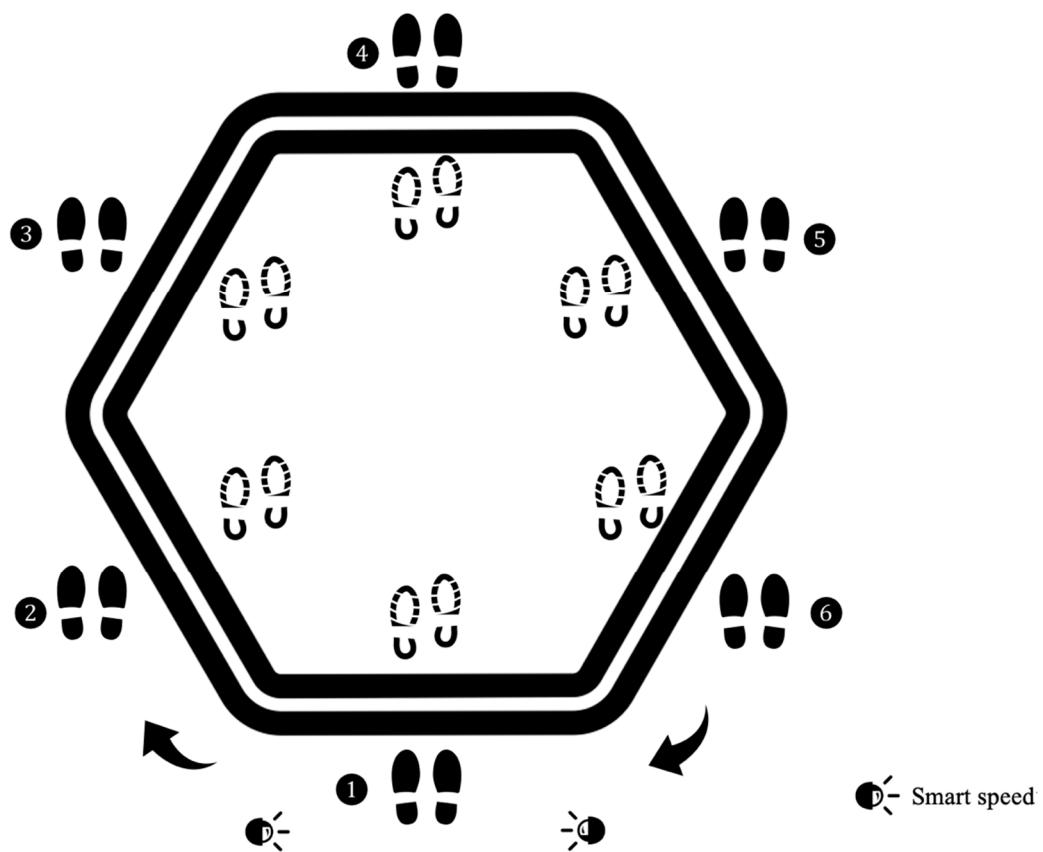

Figure S2. Hexagon test
